# Supplementary material for: Potential use of local and systemic humoral immune response parameters to forecast Mycoplasma hyopneumoniae associated lung lesions
Source: PLoS One. 2017 Apr 5;12(4):e0175034. doi: 10.1371/journal.pone.0175034 (PMC5381809; doi:10.1371/journal.pone.0175034)
Supplement: S1 Table — (XLSX) [file pone.0175034.s001.xlsx]

## Sheet: Experimental
Animal Ref	Necropsy (dpi)	Lungs lesions	Scoring Ph.Eur.	Seropositive	S/P ratio	BALF Total Ab positive	BALF Total Ab OD	BALF IgA positive	BALF IgA OD	IgG1 positive	IgG1 OD	IgG2 positive	IgG2 OD
4	21	1	7	0	0	1	1.50925	1	1.6735	0	0	0	0.0005
8	21	1	20.7	0	0.0889831	1	1.08125	1	2.2095	0	0	0	0.022
11	21	1	1.45	0	0.105932	1	1.74225	1	2.3415	0	0	0	0.0635
14	21	1	7.88	0	0.0279661	1	0.68925	1	1.5855	0	0	0	0
27	21	1	15	0	0	1	1.82125	1	1.9555	0	0	0	0.009
28	21	1	20.65	0	0.0466102	1	1.51925	1	1.9585	0	0	0	0.009
30	21	1	3.86	0	0	1	1.83325	1	2.1785	0	0	0	0.001
31	21	0	0	0	0.0635593	1	0.97825	1	1.3265	0	0	0	0.0225
32	21	1	3.05	0	0	1	0.50425	1	1.6255	0	0	0	-0.004
35	21	1	7.52	1	0.504237	1	1.39825	1	2.9495	0	0.05	0	0.0585
38	21	0	0	0	0	1	1.02525	1	1.8995	0	0	0	-0.004
39	21	1	5.48	0	0	1	0.44525	1	1.1175	0	0	0	0.002
45	21	1	8.15	0	0	1	1.49325	1	1.6875	0	0	0	-0.003
46	21	1	1.54	0	0	1	0.58525	1	0.7445	0	0	0	0.0055
48	21	1	21.58	0	0	1	1.37825	1	1.7915	0	0	0	-0.0005
49	21	1	6.65	0	0.207627	1	1.07025	1	2.4885	0	0	0	0
51	21	0	0	0	0	1	1.38925	1	2.6205	0	0	0	0.0045
53	21	1	1.36	0	0.0381356	1	1.83425	1	2.9455	0	0	0	-0.0015
6	21	1	5.44	0	0	1	0.69225	1	1.9155	0	0	0	0.001
7	21	1	14.08	0	0.173729	1	1.62425	1	2.1455	0	0	0	0.013
9	21	1	4.2	0	0.0381356	1	1.36925	1	2.3165	0	0	0	0.0105
10	21	0	0	0	0	0	0	0	0.2185	0	0.03	0	0.005
15	21	1	2.45	0	0	1	0.81325	1	1.1865	0	0	0	0.012
18	21	1	20.98	0	0.131356	1	1.54625	1	2.2975	0	0	0	0.0025
22	21	1	7.2	0	0	1	0.68125	1	0.6355	0	0	0	0.003
24	21	1	2.23	0	0	1	1.08025	1	0.4025	0	0	0	0.0115
25	21	1	2.7	0	0.0889831	1	0.83325	1	0.4945	0	0	0	-0.0015
26	21	1	9.3	0	0	0	0	1	1.0675	0	0	0	0.0165
29	21	1	22.76	0	0	1	1.29925	1	1.8945	0	0	0	-0.0005
33	21	1	5.04	0	0	1	0.70125	1	2.0855	0	0	0	0.0055
36	21	1	14.5	0	0	1	1.35025	1	2.7905	0	0	0	-0.0045
40	21	0	0	0	0	1	0.51625	1	1.5555	0	0	0	0
41	21	1	32.07	1	0.665254	1	1.67325	1	2.0925	0	0.03	0	0.0405
43	21	0	0	0	0.0923729	0	0	1	0.2755	0	0	0	-0.004
47	21	0	0	0	0	1	1.15925	1	1.8995	0	0	0	0.0035
52	21	1	6.69	1	1.10593	1	2.09125	1	3.0245	0	0.04	0	0.0545
56	21	1	5.04	0	0	1	0.85625	1	1.6975	0	0	0	-0.002
10	28	1	24.67	1	0.84322	1	1.17825	1	1.3625	1	0.3025	1	0.2475
13	28	1	7.93	0	0.34322	1	1.24725	1	2.2165	1	0.268	1	0.2015
23	28	1	1	0	0	0	0.13025	0	0.1735	0	0.0345	0	0.0995
26	28	0	0	0	0	0	0	0	0.0615	0	0.001	0	0.025
29	28	1	19.16	0	-0.00423729	1	1.52525	1	2.2735	0	0.077	1	0.385
32	28	1	0.42	0	0.0381356	0	0.12625	1	1.0205	0	0.0135	0	0.109
34	28	1	13.4	0	0.309322	1	0.41225	1	1.9585	0	0.0205	1	0.215
35	28	1	3.8	0	0.470339	1	1.57425	1	2.5955	0	0.0335	0	0.0835
36	28	1	8.57	0	0.427966	1	0.83725	1	1.5885	1	0.1565	1	0.278
38	28	1	26.05	1	0.961864	1	1.20125	1	2.1425	1	0.187	1	0.4155
44	28	1	22.02	0	0.0889831	1	1.16725	1	1.7675	0	0.059	0	0.0935
46	28	1	30.75	1	1.13136	1	1.62825	1	2.0105	1	0.2495	1	0.3265
51	28	1	16.7	1	0.995763	1	0.88925	1	1.9445	1	0.4795	1	0.8285
54	28	1	24.45	1	1.42797	1	0.64925	1	0.9435	1	0.23	1	0.355
59	28	1	13.05	0	0.0889831	1	1.57225	1	0.9625	0	0.0195	0	0.065
63	28	1	9.19	1	0.588983	1	1.25625	1	1.1305	1	0.1445	1	0.178
65	28	1	13.02	1	0.690678	1	1.28725	1	2.1005	1	0.2125	0	0.097
67	28	1	22.18	1	0.588983	1	1.47925	1	1.8485	1	0.244	1	0.4475
70	28	1	3.96	1	0.851695	1	1.81825	1	1.9095	1	0.3535	1	0.625
80	28	1	0.6	0	0	0	0.15225	1	0.8435	0	0.0835	1	0.155
14	28	1	21.72	0	0.0381356	1	0.99625	1	1.0515	1	0.239	1	0.476
16	28	1	21.4	1	0.521186	1	0.73625	1	1.9525	0	0.1065	1	0.1315
20	28	1	1.75	0	0.122881	0	0.09525	1	0.9835	0	0.0095	1	0.203
24	28	1	6.37	0	0.385593	1	0.60925	1	1.1205	0	0.0655	1	0.2735
30	28	1	7	0	0.385593	1	1.43225	1	2.1065	0	0.066	0	0.123
33	28	0	0	0	0	0	0	0	0.0635	0	0	0	-0.003
37	28	1	2.5	0	0.131356	0	0	0	0.1855	0	0.0145	0	0.04
39	28	0	0	0	0	0	0	0	0.1275	0	0	0	0.0125
41	28	1	20.75	0	0	1	0.42125	0	0.2775	1	0.1335	1	0.199
42	28	0	0	0	0	0	0	0	0.1075	0	0	0	0.031
45	28	0	0	0	0	0	0	0	0.0745	0	0.0025	0	0.0235
48	28	1	3.33	0	0	1	0.83425	1	0.9215	0	0.004	0	0.0105
53	28	0	0	0	0.0805085	0	0	0	0.2035	0	0.079	0	0.0245
57	28	0	0	0	0.165254	0	0.29725	1	0.5685	0	0.0565	1	0.1375
58	28	1	1.58	0	0	0	0.17725	1	0.7365	0	0.0025	0	0.057
66	28	0	0	0	0	0	0	0	0.0705	0	0.0195	0	0.0255
69	28	1	23.05	0	0.351695	1	1.07125	1	1.2495	0	0.1025	0	0.1115
76	28	1	0.4	1	0.572034	0	0.23725	1	0.6385	0	0.0835	1	0.183
77	28	0	0	0	0.0381356	0	0.20925	1	1.4105	1	0.1815	1	0.3355
78	28	1	2.5	0	0	0	0	0	0.0245	0	0	0	0.045
9	28	1	50.35	0	0.029661	1	1.64825	1	1.7825	0	0.0325	1	0.13
11	28	1	3	0	0	0	0	1	0.4055	0	0.0125	0	0.05
12	28	0	0	0	0.0550847	0	0	1	0.2995	0	-0.001	0	0.0455
17	28	0	0	0	0	0	0.06825	0	0.2555	0	0.025	1	0.189
18	28	1	14.07	0	-0.00423729	1	1.34925	1	0.9575	0	0.0235	0	0.1095
19	28	1	18.3	0	0.444915	1	1.59025	1	1.2795	1	0.141	1	0.3295
21	28	1	13.2	0	0.34322	1	1.37625	1	1.1305	1	0.158	1	0.282
25	28	1	7.9	0	0.478814	1	0.66025	1	0.4665	1	0.13	1	0.554
27	28	1	11.9	1	0.665254	1	1.58125	1	1.0615	0	0.037	1	0.152
28	28	1	3.15	0	0	1	0.56525	1	1.2745	0	0.0135	0	0.042
31	28	0	0	0	0	0	0	0	0.0235	0	0.001	0	0.024
40	28	1	8.18	0	0	0	0.11625	0	0.1965	0	0.0765	1	0.2315
43	28	1	0.62	0	0.199153	1	0.91425	1	1.2195	0	0.077	1	0.2205
62	28	1	9.65	0	0	1	0.62825	1	0.2965	0	0.0015	0	0.1125
71	28	1	4.6	0	0	0	0	0	0	0	0.0245	0	0.0355
72	28	1	20.5	0	0	1	0.64625	1	1.0765	0	0.1185	1	0.144
73	28	1	4.08	0	0	1	1.29925	1	2.0515	0	0.1165	0	0.0835
74	28	1	2.62	0	0.258475	1	0.91025	1	0.7995	0	0.124	0	0.078
75	28	1	18.4	0	0.0466102	1	1.18825	1	0.7365	0	0.057	1	0.185
79	28	1	6.59	0	0.427966	1	1.34325	1	0.5335	1	0.3685	1	0.2175

## Sheet: Chronological
Animal Ref	S/P W1	S/P Week3	S/P Week6	S/P Week9	S/P Week12	S/P Week15	S/P Week18	S/P Week22	Seroconversion	Necropsy Week	IgG1 positive	IgG1 OD	IgG2 positive	IgG2 OD	Lungs lesions	Scoring Ph.Eur.
7	0.254802	0.0358515	0.0102433	0	*	*	*	*	0	9	0	0	0	0.0015	0	0
61	0	0	0	0	*	*	*	*	0	9	0	0	0	0.0205	0	0
153	0	0	0.15749	0	*	*	*	*	0	9	0	0	0	0.024	0	0
191	0	0	0	0	*	*	*	*	0	9	1	0.157	0	0.0305	0	0
211	0.00256082	0.00256082	0.00256082	0.152369	*	*	*	*	0	9	1	0.23	0	0.0465	0	0
258	0.170294	0.0166453	0	0.852753	*	*	*	*	1	9	1	1.1555	1	0.593	0	0
336	0	0	0	0	*	*	*	*	0	9	0	0	0	0.019	0	0
396	0	0	0	0	*	*	*	*	0	9	0	0	0	0	0	0
454	0	0	0	0	*	*	*	*	0	9	0	0.0205	0	0.054	0	0
476	0.514266	0.174669	0.507307	0.707407	*	*	*	*	1	9	1	0.3	0	0.1155	0	0
9	0	0	0	0	0	*	*	*	0	12	0	0	0	-0.005	1	1.2412
32	1.41229	1.02177	0.183099	0	0	*	*	*	0	12	0	0	0	0	0	0
102	0	0	0	0	0	*	*	*	0	12	0	0	0	0.013	0	0
172	0	0	0	0	0	*	*	*	0	12	0	0	0	0.001	0	0
273	0	0	0.308579	0.0409731	0	*	*	*	0	12	0	0.0095	0	0.029	0	0
294	0	0	0	0.121781	0	*	*	*	0	12	1	0.365	1	0.232	1	7.0188
321	0	0	0	0	0	*	*	*	0	12	0	0	0	0.0085	0	0
355	0	0.0981211	0	0	0	*	*	*	0	12	0	0	0	0.0485	0	0
418	0	0	0	0	0	*	*	*	0	12	0	0.022	0	0.006	1	4.2404
450	0	0	0.00765484	0	0.19833	*	*	*	0	12	0	0.0075	0	0.108	1	3.7436
486	0	0	0	0	0	*	*	*	0	12	0	0	0	0.0065	0	0
501	0	0	0.160752	0	0	*	*	*	0	12	0	0.013	0	0.01	0	0
33	0.147247	0.112676	0	0	0	0	*	*	0	15	0	0	0	0.021	1	1.4804
80	4.1895	0	*	0	*	0	*	*	0	15	0	0	0	0.024	1	0.91
162	1.12804	0.798976	1.62868	0.253521	*	0.258643	*	*	0	15	0	0	0	0.013	0	0
212	0	0	0	*	2.21639	0.685019	*	*	1	15	1	0.333	0	0.1235	1	11.0668
227	0.158771	0	0.0204866	0.465813	0.0128041	0.421255	*	*	0	15	0	0.0035	1	0.292	1	10.2572
325	0	0	0	0	0	0.0160056	*	*	0	15	0	0	0	0.0095	1	5.1788
362	0	0	0	0.0285317	0	0.0911621	*	*	0	15	0	0	0	0.0475	1	5.5652
22	0	0.0400943	0.0731132	0.0825472	0.129717	0.148585	0.0471698	*	0	18	0	0	0	-0.002	1	1.1676
68	0.0117925	0	0.0235849	0.15566	0.266509	1.14623	2.92453	*	1	18	0	0	1	2.7305	1	27.4612
138	0.337264	0.0636792	0.00707547	0	0.179245	0.0377358	0.200472	*	0	18	1	0.382	1	1.005	0	0
157	0.0919811	0.127358	0.0943396	0.0471698	0.0518868	0.139151	0.120283	*	0	18	0	0	1	0.3335	1	0.2844
160	0.00943396	0.0896226	0.141509	0.110849	0.17217	0	1.50194	*	1	18	0	0	1	1.943	0	0
215	0.0395078	0	0	0	0		0	*	0	18	1	0.5805	1	0.806	1	7.4788
224	0.332254	0	0	0.00841969	0		1.00583	*	1	18	0	0.009	1	1.254	1	0.3212
300	0	0	0	0	0		0	*	0	18	1	0.2065	1	0.3155	0	0
322	0	0	0	0	0	0	0	*	0	18	0	0	0	0.0415	1	0.1924
368	0	0	0.162565	0	0	0	0.463083	*	0	18	0	0	0	0.0555	0	0
381	0	0	0	0	0	0	0.665155	*	1	18	0	0	0	0.0445	0	0
425	0	0	0	0.295958	*	1.01304	0.791395	*	1	18	0	0	0	0.1105	1	0.0268
458	0.355932	0.196871	0	0	*	0	1.38331	*	1	18	0	0.044	1	0.9715	1	3.1916
34	0.285377	0	0.136792	0.0613208	0.0165094	0.400943	0.45283	0.339623	0	22	0	0	0	0.0285	1	0.5052
72	0.247642	0.0259434	0	0.132075	0.0424528	0.0801887	0.139151	2.82075	1	22	0	0.0285	1	2.1945	1	19.1076
78	0.59434	0.0235849	0	0.0872642	0.106132	0.0731132	0.662736	2.31604	1	22	0	0	1	1.3505	1	6.798
141	0.108491	0.0542453	0.0377358	0.0117925	0.0188679	0.235849	0.455189	2.27594	1	22	0	0.001	1	1.9505	1	23.8548
179	0	0	0	0	0	0	0	0	0	22	0	0.0095	1	1.433	1	16.09
220	0	0	0	0	0		0.825777	2.81671	1	22	0	0.0245	1	1.015	1	12.2076
255	0	0	0	0	0		3.96049	3.38536	1	22	1	0.154	1	1.862	0	0
259	0.194948	0	0	0	0		0.842617	0.887953	1	22	0	0	1	1.198	0	0
304	0	0	0	0	0	0	0	0	0	22	0	0.0205	1	0.651	1	1.5356
316	0.0161117	0.0504834	0.0676692	0.0870032	0.437164	0.404941	4.74221	0.568206	1	22	0	0.0054	1	0.1409	1	2.2716
328	0	0	0	0	0	0	0.0926166	0.0472798	0	22	0	0	0	0.123	1	1.646
332	0.106337	0.0418904	0.0526316	0.422127	0.632653	3.35231	4.42857	3.99033	1	22	0	0	1	1.7367	1	20.8924
383	0	0.504534	0.112047	0	0	0	0.689767	1.58614	1	22	0	0	1	0.136	0	0
407	0	0	0.181226	0	*	0.100391	0.0378096	0.0273794	0	22	0	0	0	0	1	4.8476
460	0	0	0	0	*	0.637549	1.98305	0.822686	1	22	0	0.0845	1	1.702	1	1.7196
487	0	0	0	0	*	0.554107	0.924381	1.4485	1	22	0	0.038	1	0.8245	0	0

## Sheet: Slaughterhouse
Batch	Mean IgG1 OD	IgG1 positive	Mean IgG2 OD	IgG2 positive	Mean S/P	Seropositive	Scoring Madec (Mean)	Scoring Ph.Eur (Mean)	% Lung with lesions
1	0.39915	1	0.62705	1	1.33456	1	4.06186	5.0132	74
2	0.22595	1	0.65035	1	1.63855	1	2.63542	2.40281	54
4	0.1225	0	0.69135	1	1.70852	1	2.76768	2.64485	62
5	0.28565	1	0.95405	1	1.25421	1	7.19481	10.7465	99
6	0.0839	0	0.1653	1	0.375205	0	4.32292	5.49094	71
8	0.0208	0	0.1989	1	0.269043	0	1.875	1.01125	61
9	0.0455	0	0.1082	0	0.0154423	0	2.49	2.1367	59
10	0.10675	0	0.263355	1	0.120172	0	2.37113	1.91918	64
11	0.1425	1	0.8479	1	1.16942	1	3.36082	3.73031	68
12	0.2688	1	1.6705	1	3.27296	1	6.34694	9.1949	88
14	0.1519	1	0.26365	1	0.568302	1	6.26596	9.0467	76
15	0.0902	0	0.89275	1	2.08089	1	4.91579	6.57589	82
17	0.02355	0	0.1041	0	0.104975	0	1.42424	0.186364	57
19	0.0135	0	0.8819	1	1.50641	1	1.60204	0.511735	65
20	0.13065	1	1.6763	1	2.78817	1	3.09574	3.24521	68
21	0.3937	0	1.93155	1	1.96094	1	2.38947	1.95274	63
25	0.03375	0	0.572	1	1.01904	1	10.2747	16.3827	81
28	0.3338	1	2.2153	1	2.87361	1	2.59036	2.32036	65
29	0.05795	0	0.50425	1	0.751706	1	3.94737	4.80368	62
35	0.0003	0	0.12835	0	0.361126	0	1.59184	0.493061	34
39	0.0758	0	0.1887	1	0.0407112	0	1.9798	1.20303	44
44	0.11095	0	0.60535	1	1.38017	1	5.79592	8.18653	80
48	0.11195	0	0.64145	1	0.35235	0	2.55556	2.25667	60
49	0.1587	1	0.78875	1	1.25256	1	3.5	3.985	51
51	0.5255	1	1.1402	1	1.22631	1	8.09574	12.3952	97
54	0.090275	0	1.4067	1	1.60678	1	4.64634	6.0828	70
55	0.18035	1	0.68675	1	1.62944	1	6.48485	9.44727	81
60	0.42245	1	1.36735	1	1.99	1	4.94624	6.63161	81
61	0.1291	0	0.6436	1	1.40851	1	2.83908	2.77552	60
62	0.35615	1	1.04255	1	0.92979	1	4.85714	6.46857	80
63	0.03545	0	1.0303	1	0.97066	1	3.70652	4.36293	63
66	0.2688	1	1.17275	1	2.9	1	4.03261	4.95967	65
71	0.07085	0	0.804	1	1.74108	1	6	8.56	81
72	0.23595	1	1.0796	1	0.591407	1	4.10112	5.08506	70
76	0.13385	1	1.02385	1	1.70613	1	7.84615	11.9385	88
77	0.18505	1	0.47665	1	0.303382	0	1.67416	0.643708	49
80	0.0667	0	0.39955	1	0.669133	1	6.04396	8.64044	86
81	0.8749	1	1.40065	1	1.48924	1	2.51648	2.18516	51
85	0.05505	0	0.88165	1	0.691326	1	2.2191	1.64096	48
87	0.27405	1	1.1711	1	1.68	1	3.98734	4.87684	67
88	0.2682	1	1.0309	1	1.72086	1	4.7234	6.22383	62
90	0.0507	0	0.04905	0	0.0364452	0	3.93407	4.77934	74
91	0.13075	1	0.67185	1	0.949448	1	2.36842	1.91421	68
93	0.02885	0	0.76875	1	0.79592	1	5.43333	7.523	79
94	0.45985	1	1.2282	1	1.88853	1	7.01235	10.4126	83
98	0.0976	0	1.15785	1	2.07717	1	2.33684	1.85642	61
100	0.0767	0	0.97775	1	0.842997	1	1.56579	0.445395	50
101	0.0768	0	0.18845	1	0.0579784	0	2.0102	1.25867	43
102	0.15325	1	0.51735	1	0.310277	0	2.97938	3.03227	54
103	0.09365	0	0.23185	1	0.0773466	0	3.83158	4.59179	76
104	0.71355	1	1.6668	1	3.15	1	4.40206	5.63577	73
105	0.0826	0	0.2754	1	1.23932	1	9.86813	15.6387	90
107	0.154	1	0.4653	1	0.371294	0	4.4	5.632	60
108	0.19375	1	0.89725	1	1.0538	1	5.16	7.0228	77
